# Supplementary material
Source: PubMed Central journal article supplement (PMC9899274)
Supplement: 41467_2023_36279_MOESM2_ESM.pdf [file 41467_2023_36279_MOESM2_ESM.pdf]

### Description of Additional Supplementary Files

File Name: Supplementary Movie 1

Description: **Representative DIC time lapse movies of platelets with or without SARS-CoV-2 S protein.**

(A) Movies of platelets seeded on collagen type I coating preincubated without (left) or with S protein (right). (B) Movies of platelets seeded on poly-lysine coating preincubated without (left) or with S protein (right). (C) Movies of platelets seeded on fibronectin coating preincubated without (left) or with S protein (right). Scale bars: 5  $\mu$ m.

File Name: Supplementary Movie 2

Description: **Reconstructed tomograms, acquired on platelets incubated with SARS-CoV-2 S protein.**

(A) Tomographic reconstruction of a filopodial platelet protrusion. (B) Tomographic reconstruction of a platelet protrusion including a microtubule. Scale Bars: (A) 100 nm; (B) 200 nm.
